# Supplementary material
Source: HighWire-hosted journal article supplement (https://cancerpreventionresearch.aacrjournals.org/content/suppl/2009/05/08/1940-6207.CAPR-07-0017)
Supplement: CaPR_7-08_Lee.pdf [file CaPR_7-08_Lee.pdf]

## SUPPLEMENTAL MATERIAL

### Supplemental Tables

**Table S1.** Demographic data of MDACC datasets.

| Dataset | Samplename | Smoke   | QuitYrs | SmokeYrs | PPD | PkYrs | Sex | Age  | Race     |
|---------|------------|---------|---------|----------|-----|-------|-----|------|----------|
| MDACC1  | C4.19.B    | CURRENT | .       | 29.3     | 0.8 | 22.0  | M   | 49   | Black    |
| MDACC1  | C0.13.3M   | CURRENT | .       | 34.0     | 1.0 | 34.0  | M   | 54   | White    |
| MDACC1  | C0.13.B    | CURRENT | .       | 34.0     | 1.0 | 34.0  | M   | 54   | White    |
| MDACC1  | C0.15.3M   | CURRENT | .       | 32.5     | 1.0 | 32.5  | M   | 56   | White    |
| MDACC1  | C0.15.B    | CURRENT | .       | 32.5     | 1.0 | 32.5  | M   | 56   | White    |
| MDACC1  | C4.20.B    | CURRENT | .       | 41.0     | 1.0 | 41.0  | F   | 57   | White    |
| MDACC1  | C2.14.B    | CURRENT | 0.6     | 41.1     | 1.5 | 61.6  | M   | 58   | White    |
| MDACC1  | C4.17.B    | CURRENT | .       | 36.1     | 1.0 | 36.1  | M   | 58   | White    |
| MDACC1  | C2.11.B    | CURRENT | .       | 43.1     | 1.0 | 43.1  | F   | 61   | White    |
| MDACC1  | C4.18.B    | CURRENT | .       | 48.8     | 0.9 | 44.0  | M   | 67   | White    |
| MDACC1  | C2.12.B    | CURRENT | .       | 46.8     | 1.3 | 58.5  | M   | 72   | White    |
| MDACC1  | F2.3.B     | FORMER  | 15.6    | 15.8     | 2.0 | 31.7  | F   | 46   | White    |
| MDACC1  | F2.4.B     | FORMER  | 6.1     | 27.5     | 1.3 | 34.4  | M   | 54   | White    |
| MDACC1  | F0.8.3M    | FORMER  | 16.1    | 27.6     | 1.4 | 38.7  | M   | 58   | White    |
| MDACC1  | F0.8.B     | FORMER  | 16.1    | 27.6     | 1.4 | 38.7  | M   | 58   | White    |
| MDACC1  | F0.7.3M    | FORMER  | 13.9    | 38.5     | 1.0 | 38.5  | F   | 66   | White    |
| MDACC1  | F0.7.B     | FORMER  | 13.9    | 38.5     | 1.0 | 38.5  | F   | 66   | White    |
| MDACC1  | F2.16.B    | FORMER  | 35.3    | 20.4     | 1.0 | 20.4  | M   | 73   | White    |
| MDACC2  | CB2HT09    | CURRENT | .       | 32.1     | 1.5 | 48.2  | M   | 46   | White    |
| MDACC2  | CB4HT27    | CURRENT | .       | 29.6     | 2.5 | 73.9  | F   | 48   | White    |
| MDACC2  | CB4HT31    | CURRENT | 0.1     | 26.1     | 0.9 | 23.5  | M   | 50   | White    |
| MDACC2  | CB2HT01    | CURRENT | .       | 38.3     | 1.5 | 57.5  | F   | 53   | White    |
| MDACC2  | CB2HT13    | CURRENT | .       | 41.2     | 1.5 | 61.8  | M   | 54   | White    |
| MDACC2  | CA0HT06    | CURRENT | .       | 31.8     | 1.0 | 31.8  | F   | 57   | Hispanic |
| MDACC2  | CB0HT05    | CURRENT | .       | 31.8     | 1.0 | 31.8  | F   | 57   | Hispanic |
| MDACC2  | CA0HT26    | CURRENT | .       | 39.7     | 1.5 | 59.5  | M   | 58   | White    |
| MDACC2  | CB0HT25    | CURRENT | .       | 39.7     | 1.5 | 59.5  | M   | 58   | White    |
| MDACC2  | CA0HT16    | CURRENT | .       | 40.0     | 1.0 | 40.0  | F   | 65   | White    |
| MDACC2  | CB0HT15    | CURRENT | .       | 40.0     | 1.0 | 40.0  | F   | 65   | White    |
| MDACC2  | CB2HT11    | CURRENT | .       | 46.5     | 1.0 | 46.5  | F   | 66   | White    |
| MDACC2  | CA0HT30    | CURRENT | .       | 21.7     | 1.0 | 21.7  | F   | #N/A | #N/A     |
| MDACC2  | CB0HT29    | CURRENT | .       | 21.7     | 1.0 | 21.7  | F   | #N/A | #N/A     |
| MDACC2  | CB4HT33    | CURRENT | 0.1     | 37.9     | 1.0 | 37.9  | F   | #N/A | #N/A     |
| MDACC2  | FA0HT04    | FORMER  | 2.3     | 19.4     | 1.1 | 21.3  | M   | 41   | Black    |
| MDACC2  | FB2HT17    | FORMER  | 2.4     | 28.9     | 1.0 | 28.9  | F   | 45   | White    |
| MDACC2  | FB2HT19    | FORMER  | 1.0     | 45.7     | 1.0 | 45.7  | M   | 62   | White    |
| MDACC2  | FB2HT21    | FORMER  | 15.4    | 31.3     | 0.8 | 25.0  | M   | 64   | White    |
| MDACC2  | FA0HT24    | FORMER  | 1.1     | 59.1     | 1.0 | 59.1  | M   | 73   | White    |
| MDACC2  | FB0HT23    | FORMER  | 1.1     | 59.1     | 1.0 | 59.1  | M   | 73   | White    |
| MDACC2  | FA0HT36    | FORMER  | 5.1     | 30.2     | 1.5 | 45.3  | M   | #N/A | #N/A     |
| MDACC2  | FB0HT35    | FORMER  | 5.1     | 30.2     | 1.5 | 45.3  | M   | #N/A | #N/A     |

**Table S2.** Differentially expressed genes between former and current smokers. Positive log fold change ( $\text{Log}_{10}\text{FC}$ ) means that expression is lower in former smokers. The symbols of genes that were also found to be significantly differentially expressed between current and never smokers are shown in **BOLD**.

| Symbol               | $\text{Log}_{10}\text{FC}$ | Z   | Gene Title                                                                                 | Probeset    | RefSeq    |
|----------------------|----------------------------|-----|--------------------------------------------------------------------------------------------|-------------|-----------|
| <b>SCGB1A1</b>       | -0.9                       | -10 | secretoglobin, family 1A, member 1                                                         | 205725_at   | NM_003357 |
| <b>PROS1</b>         | -0.8                       | -9  | protein S (alpha)                                                                          | 207808_s_at | NM_000313 |
| <b>C3</b>            | -0.8                       | -8  | complement component 3                                                                     | 217767_at   | NM_000064 |
| <b>MUC5AC</b>        | -0.7                       | -9  | mucin 5, subtypes A and C                                                                  | 213432_at   | ---       |
| <b>FLJ10134</b>      | -0.7                       | -12 | hypothetical protein FLJ10134<br>potassium channel tetramerisation<br>domain containing 12 | 219410_at   | NM_018004 |
| <b>KCTD12</b>        | -0.7                       | -8  | domain containing 12                                                                       | 212192_at   | NM_138444 |
| <b>AMY2A</b>         | -0.7                       | -9  | amylase, alpha 2A; pancreatic                                                              | 208498_s_at | NM_000699 |
| RYR3                 | -0.6                       | -11 | ryanodine receptor 3                                                                       | 206306_at   | NM_001036 |
| <b>SAA2</b>          | -0.5                       | -7  | serum amyloid A2                                                                           | 214456_x_at | NM_030754 |
| PROM1                | -0.5                       | -5  | prominin 1                                                                                 | 204304_s_at | NM_006017 |
| SDC4                 | -0.5                       | -5  | syndecan 4 (amphiglycan, ryudocan)                                                         | 202071_at   | NM_002999 |
| <b>MAOB</b>          | -0.5                       | -8  | monoamine oxidase B                                                                        | 204041_at   | NM_000898 |
| HLA-DQA1             | -0.5                       | -7  | MHC, class II, DQ alpha 1                                                                  | 213831_at   | NM_002122 |
| <b>HLA-DQB2</b>      | -0.5                       | -6  | MHC, class II, DQ beta 2                                                                   | 212998_x_at | NM_182549 |
| BF                   | -0.5                       | -5  | B-factor, properdin                                                                        | 202357_s_at | NM_001710 |
| <b>FABP6</b>         | -0.5                       | -6  | fatty acid binding protein 6                                                               | 210445_at   | NM_001445 |
| <b>DKFZP586A0522</b> | -0.5                       | -4  | DKFZP586A0522 protein                                                                      | 207761_s_at | NM_014033 |
| <b>C14orf132</b>     | -0.4                       | -8  | Ch 14 open reading frame 132                                                               | 218820_at   | NM_020215 |
| HLA-DRB3             | -0.4                       | -9  | MHC, class II, DR beta 3                                                                   | 221491_x_at | NM_022555 |
| TMC5                 | -0.4                       | -4  | transmembrane channel-like 5                                                               | 219580_s_at | NM_024780 |
| <b>ITM2A</b>         | -0.4                       | -10 | integral membrane protein 2A                                                               | 202746_at   | NM_004867 |
| HLA-DQB1             | -0.4                       | -6  | MHC, class II, DQ beta 1                                                                   | 212999_x_at | NM_002123 |
| PTGER4               | -0.4                       | -5  | prostaglandin E receptor 4                                                                 | 204897_at   | NM_000958 |
| <b>C6</b>            | -0.4                       | -9  | complement component 6                                                                     | 210168_at   | NM_000065 |
| RARRES1              | -0.4                       | -5  | retinoic acid receptor responder 1                                                         | 221872_at   | NM_002888 |
| <b>RRAD</b>          | -0.4                       | -5  | Ras-related associated with diabetes                                                       | 204802_at   | NM_004165 |
| <b>TEKT2</b>         | -0.4                       | -6  | tektin 2 (testicular)                                                                      | 210323_at   | NM_014466 |
| SOD2                 | -0.4                       | -5  | superoxide dismutase 2, mitochondrial                                                      | 215223_s_at | NM_000636 |
| ---                  | -0.4                       | -6  | ---                                                                                        | 217028_at   | ---       |
| LY75                 | -0.4                       | -5  | lymphocyte antigen 75<br>dimethylarginine dimethylaminohydrolase                           | 205668_at   | NM_002349 |
| DDAH1                | -0.4                       | -4  | 1<br>Homo sapiens mRNA; cDNA                                                               | 209094_at   | NM_012137 |
| ---                  | -0.4                       | -4  | DKFZp564J0323                                                                              | 212463_at   | ---       |
| SOX9                 | -0.4                       | -10 | SRY (sex determining region Y)-box 9                                                       | 202935_s_at | NM_000346 |
| SAA2                 | -0.4                       | -5  | serum amyloid A2                                                                           | 208607_s_at | NM_030754 |
| <b>HM74</b>          | -0.4                       | -5  | putative chemokine receptor                                                                | 205220_at   | NM_006018 |
| MYB                  | -0.3                       | -5  | v-myb viral oncogene homolog                                                               | 204798_at   | NM_005375 |
| SAA4                 | -0.3                       | -6  | serum amyloid A4, constitutive                                                             | 207096_at   | NM_006512 |
| CCL4                 | -0.3                       | -6  | chemokine (C-C motif) ligand 4                                                             | 204103_at   | NM_002984 |
| ACTN1                | -0.3                       | -4  | actinin, alpha 1                                                                           | 208636_at   | NM_001102 |
| <b>TNFAIP3</b>       | -0.3                       | -4  | TNF, alpha-induced protein 3                                                               | 202644_s_at | NM_006290 |
| ANXA4                | -0.3                       | -4  | annexin A4                                                                                 | 201302_at   | NM_001153 |
| <b>C14orf78</b>      | -0.3                       | -5  | chromosome 14 open reading frame 78                                                        | 212992_at   | ---       |
| <b>PECI</b>          | -0.3                       | -6  | peroxisomal D3,D2-enoyl-CoA isomerase                                                      | 218025_s_at | NM_006117 |

|                  |      |    |                                                                                                                                                  |             |           |
|------------------|------|----|--------------------------------------------------------------------------------------------------------------------------------------------------|-------------|-----------|
| LRBA             | -0.3 | -5 | LPS-responsive vesicle trafficking, beach and anchor containing                                                                                  | 214109_at   | NM_006726 |
| <b>SLIT2</b>     | -0.3 | -7 | slit homolog 2 (Drosophila)                                                                                                                      | 209897_s_at | NM_004787 |
| <b>CYP2A7</b>    | -0.3 | -8 | CYP2A7                                                                                                                                           | 207718_x_at | NM_000764 |
| PER2             | -0.3 | -4 | period homolog 2 (Drosophila)                                                                                                                    | 205251_at   | NM_003894 |
| TMPRSS3          | -0.3 | -5 | transmembrane protease, serine 3                                                                                                                 | 220177_s_at | NM_022364 |
| ADH6             | -0.3 | -5 | alcohol dehydrogenase 6 (class V)                                                                                                                | 214261_s_at | NM_000672 |
| LAS1             | -0.3 | -4 | lung adenoma susceptibility 1-like                                                                                                               | 220168_at   | NM_018272 |
| <b>MB</b>        | -0.3 | -4 | myoglobin                                                                                                                                        | 204179_at   | NM_005368 |
| FSTL1            | -0.3 | -5 | follistatin-like 1                                                                                                                               | 208782_at   | NM_007085 |
| <b>AK1</b>       | -0.3 | -4 | adenylate kinase 1                                                                                                                               | 202587_s_at | NM_000476 |
| <b>OXTR</b>      | -0.3 | -5 | oxytocin receptor                                                                                                                                | 206825_at   | NM_000916 |
| PIP5K1B          | -0.3 | -5 | phosphatidylinositol-4-phosphate 5-kinase, type I, beta                                                                                          | 205632_s_at | NM_003558 |
| DDX3Y            | -0.3 | -4 | DEAD (Asp-Glu-Ala-Asp) box polypeptide 3, Y-linked                                                                                               | 205000_at   | NM_004660 |
| CCL3             | -0.3 | -5 | chemokine (C-C motif) ligand 3                                                                                                                   | 205114_s_at | NM_002983 |
| <b>SERPING1</b>  | -0.3 | -5 | serine (or cysteine) proteinase inhibitor                                                                                                        | 200986_at   | NM_000062 |
| FLJ22028         | -0.3 | -4 | hypothetical protein FLJ22028                                                                                                                    | 219802_at   | NM_024854 |
| H2AV             | -0.3 | -4 | histone H2A.F/Z variant                                                                                                                          | 212205_at   | NM_012412 |
| ---              | -0.3 | -4 | Homo sapiens guanine nucleotide binding protein (G protein), alpha 11 (Gq class), mRNA (cDNA clone IMAGE:6213090), containing frame-shift errors | 213766_x_at | ---       |
| <b>CTNNAL1</b>   | -0.3 | -4 | catenin (cadherin-associated protein), alpha-like 1                                                                                              | 202468_s_at | NM_003798 |
| VNN3             | -0.3 | -4 | vanin 3                                                                                                                                          | 220528_at   | NM_018399 |
| DOCK4            | -0.3 | -5 | dedicator of cytokinesis 4                                                                                                                       | 205003_at   | NM_014705 |
| AIP1             | -0.3 | -6 | atrophin-1 interacting protein 1                                                                                                                 | 209737_at   | NM_012301 |
| KIAA1069         | -0.3 | -5 | KIAA1069 protein                                                                                                                                 | 214745_at   | ---       |
| <b>SLIT1</b>     | -0.3 | -6 | slit homolog 1 (Drosophila)                                                                                                                      | 213601_at   | NM_003061 |
| SHANK2           | -0.3 | -6 | SH3 and multiple ankyrin repeat domains 2                                                                                                        | 213307_at   | NM_012309 |
| <b>CYP2A6</b>    | -0.3 | -6 | cytochrome P450, family 2                                                                                                                        | 1494_f_at   | NM_000762 |
| MAK              | -0.3 | -5 | male germ cell-associated kinase                                                                                                                 | 220302_at   | NM_005906 |
| GIPC2            | -0.3 | -5 | PDZ domain protein GIPC2                                                                                                                         | 219970_at   | NM_017655 |
| <b>INHBB</b>     | -0.3 | -4 | inhibin, beta B (activin AB beta polypeptide)                                                                                                    | 205258_at   | NM_002193 |
| FHL1             | -0.3 | -5 | four and a half LIM domains 1                                                                                                                    | 201540_at   | NM_001449 |
| <b>CYP4F11</b>   | 0.3  | 7  | cytochrome P450, family 4                                                                                                                        | 206153_at   | NM_021187 |
| <b>PTPRD</b>     | 0.3  | 5  | protein tyrosine phosphatase, receptor type, D                                                                                                   | 205712_at   | NM_002839 |
| <b>SPRR3</b>     | 0.3  | 7  | small proline-rich protein 3                                                                                                                     | 218990_s_at | NM_005416 |
| <b>SPDEF</b>     | 0.3  | 5  | SAM pointed domain containing ets transcription factor                                                                                           | 213441_x_at | NM_012391 |
| <b>TRIM16</b>    | 0.3  | 4  | tripartite motif-containing 16                                                                                                                   | 204341_at   | NM_006470 |
| <b>SERPINB13</b> | 0.3  | 5  | serine (or cysteine) proteinase inhibitor                                                                                                        | 217272_s_at | NM_012397 |
| <b>HTATIP2</b>   | 0.3  | 4  | HIV-1 Tat interactive protein 2, 30kDa                                                                                                           | 209448_at   | NM_006410 |
| <b>HGD</b>       | 0.3  | 6  | homogentisate 1,2-dioxygenase                                                                                                                    | 205221_at   | NM_000187 |
| <b>NKX3-1</b>    | 0.3  | 5  | NK3 transcription factor related, locus 1                                                                                                        | 209706_at   | NM_006167 |
| GSTA4            | 0.3  | 4  | glutathione S-transferase A4                                                                                                                     | 202967_at   | NM_001512 |
| KLK11            | 0.3  | 4  | kallikrein 11                                                                                                                                    | 205470_s_at | NM_006853 |
| <b>CABYR</b>     | 0.3  | 8  | fibrousheathin 2                                                                                                                                 | 219928_s_at | NM_012189 |
| ---              | 0.3  | 5  | ---                                                                                                                                              | 217430_x_at | ---       |
| <b>CBR3</b>      | 0.3  | 7  | carbonyl reductase 3                                                                                                                             | 205379_at   | NM_001236 |
| <b>ALDH1A3</b>   | 0.3  | 5  | aldehyde dehydrogenase 1 family                                                                                                                  | 203180_at   | NM_000693 |

|                |     |   |                                                 |                          |           |
|----------------|-----|---|-------------------------------------------------|--------------------------|-----------|
| <b>AKR1C2</b>  | 0.3 | 8 | aldo-keto reductase family 1                    | 217626_at                | NM_001354 |
| <b>PROL4</b>   | 0.3 | 6 | proline rich 4 (lacrimal)                       | 204919_at                | NM_007244 |
| <b>---</b>     | 0.3 | 7 | ---                                             | 216881_x_at              | ---       |
| <b>SRPUL</b>   | 0.3 | 7 | sushi-repeat protein                            | 205499_at                | NM_014467 |
| <b>CBR1</b>    | 0.3 | 5 | carbonyl reductase 1                            | 209213_at                | NM_001757 |
| CYP4F3         | 0.3 | 8 | cytochrome P450, family 4                       | 206515_at                | NM_000896 |
| <b>GCC2</b>    | 0.3 | 4 | GRIP & coiled-coil domain-containing 2          | 202832_at                | NM_014635 |
| <b>MUC2</b>    | 0.3 | 6 | mucin 2, intestinal/tracheal                    | 204673_at                | NM_002457 |
| <b>TXN</b>     | 0.3 | 5 | thioredoxin                                     | 216609_at                | NM_003329 |
| <b>DEFB1</b>   | 0.3 | 7 | defensin, beta 1                                | 210397_at                | NM_005218 |
| CH25H          | 0.3 | 5 | cholesterol 25-hydroxylase                      | 206932_at                | NM_003956 |
| <b>SCGB2A1</b> | 0.3 | 5 | secretoglobin, family 2A, member 1              | 205979_at                | NM_002407 |
| UQCR           | 0.3 | 4 | ubiquinol-cytochrome c reductase subunit        | 202090_s_at              | NM_006830 |
| <b>UGT1A10</b> | 0.3 | 8 | UDP glycosyltransferase 1 family, A10           | 208596_s_at              | NM_019075 |
| <b>KRT5</b>    | 0.3 | 4 | keratin 5                                       | 201820_at                | NM_000424 |
| <b>SPDEF</b>   | 0.3 | 6 | SAM pointed domain                              | 220192_x_at              | NM_012391 |
| <b>SPDEF</b>   | 0.4 | 6 | containing ets transcription factor             | 214404_x_at              | NM_012391 |
| <b>TKT</b>     | 0.4 | 7 | transketolase                                   | 208699_x_at              | NM_001064 |
| <b>PGD</b>     | 0.4 | 5 | phosphogluconate dehydrogenase                  | 201118_at                | NM_002631 |
| <b>TFF1</b>    | 0.4 | 6 | trefoil factor 1 (breast cancer)                | 205009_at                | NM_003225 |
| <b>KRT13</b>   | 0.4 | 7 | keratin 13                                      | 207935_s_at              | NM_002274 |
| S100A2         | 0.4 | 4 | S100 calcium binding protein A2                 | 204268_at                | NM_005978 |
| F3             | 0.4 | 4 | coagulation factor III                          | 204363_at                | NM_001993 |
| RPL36          | 0.4 | 4 | ribosomal protein L36                           | 219762_s_at              | NM_015414 |
| GPX2           | 0.4 | 6 | glutathione peroxidase 2                        | 202831_at                | NM_002083 |
| <b>SLC7A11</b> | 0.4 | 8 | solute carrier family 7, member 11              | 217678_at                | NM_014331 |
| <b>PSCA</b>    | 0.4 | 4 | prostate stem cell antigen                      | 205319_at                | NM_005672 |
| <b>TKT</b>     | 0.4 | 6 | (Wernicke-Korsakoff syndrome)                   | 208700_s_at              | NM_001064 |
| <b>KRT15</b>   | 0.4 | 5 | keratin 15                                      | 204734_at                | NM_002275 |
| <b>TM4SF3</b>  | 0.4 | 4 | transmembrane 4 superfamily 3                   | 203824_at                | NM_004616 |
| <b>AKR1B1</b>  | 0.4 | 6 | aldo-keto reductase family 1, B1                | 201272_at                | NM_001628 |
| GAPD           | 0.4 | 4 | glyceraldehyde-3-phosphate dehydrogenase        | HUMGAPDH/M33<br>197_M_at | NM_002046 |
| <b>TCN1</b>    | 0.4 | 6 | transcobalamin I                                | 205513_at                | NM_001062 |
| <b>PRDX1</b>   | 0.4 | 4 | peroxiredoxin 1                                 | 208680_at                | NM_002574 |
| RPL35          | 0.4 | 4 | ribosomal protein L35                           | 200002_at                | NM_007209 |
| <b>RPL18A</b>  | 0.4 | 4 | ribosomal protein L18a                          | 200869_at                | NM_000980 |
| RPS18          | 0.4 | 4 | ribosomal protein S18                           | 201049_s_at              | NM_022551 |
| SFN            | 0.5 | 5 | stratifin                                       | 33323_r_at               | NM_006142 |
| RPL28          | 0.5 | 5 | ribosomal protein L28                           | 200003_s_at              | NM_000991 |
| <b>FTH1</b>    | 0.5 | 4 | ferritin, heavy polypeptide 1                   | 200748_s_at              | NM_002032 |
| <b>S100A9</b>  | 0.5 | 7 | S100 calcium binding protein A9 (calgranulin B) | 203535_at                | NM_002965 |
| <b>TXNRD1</b>  | 0.5 | 5 | thioredoxin reductase 1                         | 201266_at                | NM_003330 |
| <b>UPK1B</b>   | 0.5 | 5 | uroplakin 1B                                    | 210065_s_at              | NM_006952 |
| <b>FTH1</b>    | 0.5 | 5 | ferritin, heavy polypeptide 1                   | 214211_at                | NM_002032 |
| <b>GCLM</b>    | 0.5 | 6 | glutamate-cysteine ligase, modifier subunit     | 203925_at                | NM_002061 |
| SPARCL1        | 0.5 | 7 | SPARC-like 1 (mast9, hevin)                     | 200795_at                | NM_004684 |
| <b>ME1</b>     | 0.5 | 9 | malic enzyme 1, NADP(+)-dependent, cytosolic    | 204059_s_at              | NM_002395 |
| <b>UGT1A10</b> | 0.5 | 7 | UDP glycosyltransferase 1 family, A10           | 204532_x_at              | NM_019075 |

|                 |     |    |                                                                                                    |             |           |
|-----------------|-----|----|----------------------------------------------------------------------------------------------------|-------------|-----------|
| <b>UPK1B</b>    | 0.5 | 6  | uroplakin 1B                                                                                       | 210064_s_at | NM_006952 |
| <b>UGT1A10</b>  | 0.5 | 7  | UDP glycosyltransferase 1 family, A10                                                              | 206094_x_at | NM_019075 |
| <b>SFN</b>      | 0.5 | 5  | stratifin                                                                                          | 33322_i_at  | NM_006142 |
| <b>GCLC</b>     | 0.5 | 7  | glutamate-cysteine ligase, catalytic subunit                                                       | 202923_s_at | NM_001498 |
| <b>UGT1A10</b>  | 0.5 | 9  | UDP glycosyltransferase 1 family, A10                                                              | 215125_s_at | NM_019075 |
| <b>AGR2</b>     | 0.6 | 5  | anterior gradient 2 homolog                                                                        | 209173_at   | NM_006408 |
| <b>UGT1A10</b>  | 0.6 | 8  | UDP glycosyltransferase 1 family, A10                                                              | 207126_x_at | NM_019075 |
| <b>FTL</b>      | 0.6 | 6  | ferritin, light polypeptide                                                                        | 212788_x_at | NM_000146 |
| <b>PIR</b>      | 0.6 | 10 | Pirin                                                                                              | 207469_s_at | NM_003662 |
| <b>MSMB</b>     | 0.6 | 6  | microseminoprotein, beta-                                                                          | 210297_s_at | NM_002443 |
| <b>TALDO1</b>   | 0.6 | 6  | transaldolase 1                                                                                    | 201463_s_at | NM_006755 |
| <b>HLA-DRB3</b> | 0.6 | 10 | MHC, class II, DR beta 3                                                                           | 209728_at   | NM_022555 |
| <b>---</b>      | 0.6 | 10 | ---                                                                                                | 217187_at   | ---       |
| <b>UCHL1</b>    | 0.7 | 13 | ubiquitin carboxyl-terminal esterase L1 (ubiquitin thiolesterase)                                  | 201387_s_at | NM_004181 |
| <b>FTL</b>      | 0.7 | 6  | ferritin, light polypeptide                                                                        | 213187_x_at | NM_000146 |
| <b>TXN</b>      | 0.7 | 6  | thioredoxin                                                                                        | 208864_s_at | NM_003329 |
| <b>MSMB</b>     | 0.7 | 6  | microseminoprotein, beta-                                                                          | 207430_s_at | NM_002443 |
| <b>CSTA</b>     | 0.7 | 8  | cystatin A (stefin A)                                                                              | 204971_at   | NM_005213 |
| <b>SLC7A11</b>  | 0.7 | 15 | solute carrier family 7, member 11                                                                 | 209921_at   | NM_014331 |
| <b>TFF3</b>     | 0.8 | 7  | trefoil factor 3 (intestinal)                                                                      | 204623_at   | NM_003226 |
| <b>S100P</b>    | 0.8 | 7  | S100 calcium binding protein P                                                                     | 204351_at   | NM_005980 |
| <b>CYP1A1</b>   | 0.8 | 17 | cytochrome P450, family 1, subfamily A,                                                            | 205749_at   | NM_000499 |
| <b>CLDN10</b>   | 0.8 | 11 | claudin 10                                                                                         | 205328_at   | NM_006984 |
| <b>NQO1</b>     | 0.8 | 8  | NAD(P)H dehydrogenase, quinone 1                                                                   | 201468_s_at | NM_000903 |
| <b>NQO1</b>     | 0.8 | 10 | NAD(P)H dehydrogenase, quinone 1                                                                   | 201467_s_at | NM_000903 |
| <b>CEACAM5</b>  | 0.9 | 10 | carcinoembryonic antigen                                                                           | 201884_at   | NM_004363 |
| <b>AKR1C3</b>   | 0.9 | 10 | aldo-keto reductase family 1, C3                                                                   | 209160_at   | NM_003739 |
| <b>NQO1</b>     | 0.9 | 9  | NAD(P)H dehydrogenase, quinone 1<br>alcohol dehydrogenase 7 (class IV), mu<br>or sigma polypeptide | 210519_s_at | NM_000903 |
| <b>ADH7</b>     | 1   | 14 |                                                                                                    | 210505_at   | NM_000673 |
| <b>CYP1B1</b>   | 1   | 21 | cytochrome P450, family 1,                                                                         | 202435_s_at | NM_000104 |
| <b>AKR1C2</b>   | 1.1 | 12 | aldo-keto reductase family 1, C2                                                                   | 211653_x_at | NM_001354 |
| <b>AKR1C1</b>   | 1.1 | 11 | aldo-keto reductase family 1,                                                                      | 216594_x_at | NM_001353 |
| <b>AKR1C1</b>   | 1.2 | 11 | aldo-keto reductase family 1,                                                                      | 204151_x_at | NM_001353 |
| <b>MUC5AC</b>   | 1.2 | 11 | mucin 5, subtypes A and C,                                                                         | 214303_x_at | ---       |
| <b>AKR1B10</b>  | 1.2 | 22 | aldo-keto reductase family 1, B10                                                                  | 206561_s_at | NM_004812 |
| <b>AKR1C2</b>   | 1.3 | 12 | aldo-keto reductase family 1,                                                                      | 209699_x_at | NM_001354 |
| <b>MUC5AC</b>   | 1.3 | 12 | mucin 5, subtypes A and C                                                                          | 214385_s_at | ---       |
| <b>CYP1B1</b>   | 1.6 | 30 | cytochrome P450, family 1                                                                          | 202437_s_at | NM_000104 |
| <b>CYP1B1</b>   | 1.6 | 25 | cytochrome P450, family 1, B, 1                                                                    | 202436_s_at | NM_000104 |
| <b>ALDH3A1</b>  | 1.8 | 18 | aldehyde dehydrogenase 3 family, A1                                                                | 205623_at   | NM_000691 |

---

## Supplemental Figure Legend

**Figure S1.** Comparison of microarray and RT-PCR measurements of gene expression. The measurements are shown on log-based 2 scale for gene ALDH3A1 in MDACC1.

**Ed: Actual Fig. S1  
submitted with  
other figure files in  
required format.  
Thank you**
